# Supplementary material
Source: PubMed Central journal article supplement (PMC3804898)
Supplement: NIHMS516510-supplement-Supplemental_Table_1.pdf [file NIHMS516510-supplement-Supplemental_Table_1.pdf]

Supplemental Table 1: Changes in individual and total diacylglycerol (pMol/mg protein) by intervention group

|                                 | WL          |              | EX           |              |
|---------------------------------|-------------|--------------|--------------|--------------|
|                                 | PRE         | POST         | PRE          | POST         |
| N (male/female)                 | 8 (3/5)     |              | 8 (4/4)      |              |
| <b>Diacylglycerol (pMol/mg)</b> |             |              |              |              |
| C14:0/16:0                      | 4.8±2.2     | 2.1±0.7*     | 3.7±1.5      | 3.1±2.2*     |
| C14:0/18:0                      | 5.0±3.8     | 1.6±0.7*     | 5.9±1.6      | 4.2±1.6*     |
| C14:0/18:1                      | 12.8±5.3    | 8.3±2.9*     | 14.8±7.1     | 9.5±8.0*     |
| C16:0/18:0                      | 198.5±70.5  | 141.6±54.7*  | 452.1±93.4   | 323.4±102.2* |
| C16:0/18:1                      | 121.2±27.8  | 94.2±20.4*   | 108.8±30.4   | 47.6±17.4*   |
| C16:1/18:0                      | 2.44±0.58   | 2.13±0.77    | 2.66±0.72    | 0.87±0.33*   |
| C16:1/18:1                      | 77.9±22.6   | 47.2±9.0*    | 33.8±15.7    | 6.3±2.4*     |
| C18:0/18:1                      | 36.1±4.4    | 30.6±4.1*    | 23.9±6.9     | 12.2±4.9*    |
| DI-C14:0                        | 7.5±0.8     | 4.5±0.8*     | 1.6±0.4      | 0.5±0.1*     |
| DI-C16:0                        | 52.1±9.2    | 36.3±6.4*    | 41.5±8.9     | 22.9±9.4*    |
| DI-C16:1                        | 16.4±3.1    | 9.7±2.2      | 2.3±1.0      | 0.2±0.0*     |
| DI-C18:0                        | 195.2±44.9  | 145.2±17.3   | 517.4±136.9  | 283.2±108.4* |
| DI-C18:1                        | 128.7±20.0  | 95.6±14.4*   | 48.6±9.8     | 14.50±5.14*  |
| Total DAG                       | 942.6±288.5 | 665.4±132.3* | 1137.2±256.4 | 694.0±224.4* |

Data are mean±SEM. A two-way (group x time) repeated measures analysis of variance was used to assess differences. Data were log transformed when ANOVA assumption of normality was not met.

\* $P < 0.05$  within-group intervention. †  $P < 0.05$  between-groups difference.
