# Supplementary material
Source: PubMed Central journal article supplement (PMC3804898)
Supplement: NIHMS516510-supplement-Supplemental_Table_2.pdf [file NIHMS516510-supplement-Supplemental_Table_2.pdf]

Supplemental Table 2: Changes in individual and total ceramide and other sphingolipids (pMol/mg protein) by intervention group

|                                   | WL         |            | EX       |           |
|-----------------------------------|------------|------------|----------|-----------|
|                                   | PRE        | POST       | PRE      | POST      |
| N (male/female)                   | 8 (3/5)    |            | 8 (4/4)  |           |
| <b>Ceramide species (pMol/mg)</b> |            |            |          |           |
| C14:0                             | 0.84±0.19  | 0.57±0.08* | 1.3±0.2  | 0.8±0.1*  |
| C16:0                             | 13.0±3.4   | 18.2±4.4   | 12.3±3.9 | 3.6±1.1*  |
| C18:0                             | 30.2±7.4   | 31.9±5.3   | 17.0±2.4 | 10.4±3.1* |
| C18:1                             | 12.6±2.5   | 14.9±1.4   | 9.7±3.4  | 4.8±1.6   |
| C20:0                             | 7.4±1.1    | 6.3±1.5*   | 3.6±0.6  | 1.8±0.5*  |
| C24:0                             | 78.1±19.9  | 54.6±11.9* | 26.4±3.5 | 16.3±4.4* |
| C24:1                             | 71.3±17.6  | 74.1±15.8* | 18.0±2.5 | 11.0±3.4* |
| Total ceramide                    | 188.4±40.3 | 176.9±31.0 | 73.5±4.3 | 46.4±8.7* |
| <b>Sphingolipids (pMol/mg)</b>    |            |            |          |           |
| Dihydroceramide                   | 1.1±0.2    | 0.7±0.1*   | 0.7±0.2  | 0.4±0.2*  |
| Sphingosine                       | 1.0±0.2    | 1.2±0.2    | 1.3±0.4  | 0.6±0.1*  |
| Sphingosine 1-phosphate           | 12.9±6.2   | 8.2±2.2    | 0.9±0.5  | 0.9±0.7   |

Data are mean ± SEM. A two-way (group x time) repeated measures analysis of variance was used to assess differences. Data were log transformed when ANOVA assumption of normality was not met.

\* $P < 0.05$  within-group intervention. †  $P < 0.05$  between-groups difference.
